# Supplementary material for: Response of Juvenile Saccharina japonica to the Combined Stressors of Elevated pCO2 and Excess Copper
Source: MDPI journal article supplement (doi:10.3390/plants12051140), 2023-03-02
Supplement: s1 [file s1]

## Supplementary data for the article:

Article

# Response of Juvenile *Saccharina japonica* to the Combined Stressors of Elevated pCO<sub>2</sub> and Excess Copper

Wenze Zhang <sup>1,2,3</sup>, Lianghua He <sup>1,2</sup>, Jiangqi Pan <sup>1,2</sup>, Yuhong Zhou <sup>1,2</sup>, Ruxiang Ge <sup>1,2</sup>, Sufang Li <sup>4</sup>, Yunyun Shi <sup>1,2</sup>, Xinhua Chen <sup>1,2,\*</sup>, and Yaoyao Chu <sup>1,2,\*</sup>

<sup>1</sup> College of Marine Sciences, Fujian Agriculture and Forestry University, Fuzhou 350002, China

<sup>2</sup> Key Laboratory of Marine Biotechnology of Fujian Province, Institute of Oceanology, Fujian Agriculture and Forestry University, Fuzhou 350002, China

<sup>3</sup> Department of Aquaculture and Aquatic Sciences, Kunsan National University, Gunsan 54150, South Korea

<sup>4</sup> Laboratoire Génie des Procédés et Matériaux (LGPM), CentraleSupélec, Université Paris-Saclay, 91190 Gif-sur-Yvette, France

\* Correspondence: chenxinhua@tio.org.cn; chuyaoyao@fafu.edu.cn

**Table S1.** Analysis of variance (two-way ANOVA) examining the effects of pCO<sub>2</sub> level and copper condition on RGR,  $F_v/F_m$ , rETR, NPQ, Chl *a*, Chl *c*, Car and soluble carbohydrates of juvenile sporophytes of *Saccharina japonica*.

| Factors                   | df | F      | P       |
|---------------------------|----|--------|---------|
| RGR                       |    |        |         |
| pCO <sub>2</sub>          | 1  | 66.853 | < 0.001 |
| Copper                    | 3  | 12.913 | < 0.001 |
| pCO <sub>2</sub> × Copper | 3  | 15.001 | < 0.001 |
| $F_v/F_m$                 |    |        |         |

|                              |   |        |         |
|------------------------------|---|--------|---------|
| pCO <sub>2</sub>             | 1 | 32.396 | < 0.001 |
| Copper                       | 3 | 3.829  | 0.031   |
| pCO <sub>2</sub> × Copper    | 3 | 1.309  | 0.306   |
| <b>rETR</b>                  |   |        |         |
| pCO <sub>2</sub>             | 1 | 26.661 | < 0.001 |
| Copper                       | 3 | 0.786  | 0.519   |
| pCO <sub>2</sub> × Copper    | 3 | 4.464  | 0.018   |
| <b>NPQ</b>                   |   |        |         |
| pCO <sub>2</sub>             | 1 | 20.616 | < 0.001 |
| Copper                       | 3 | 0.972  | 0.430   |
| pCO <sub>2</sub> × Copper    | 3 | 4.169  | 0.023   |
| <b>Chl <i>a</i></b>          |   |        |         |
| pCO <sub>2</sub>             | 1 | 51.247 | < 0.001 |
| Copper                       | 3 | 10.890 | < 0.001 |
| pCO <sub>2</sub> × Copper    | 3 | 4.966  | 0.013   |
| <b>Chl <i>c</i></b>          |   |        |         |
| pCO <sub>2</sub>             | 1 | 66.853 | < 0.001 |
| Copper                       | 3 | 12.913 | < 0.001 |
| pCO <sub>2</sub> × Copper    | 3 | 15.001 | < 0.001 |
| <b>Car</b>                   |   |        |         |
| pCO <sub>2</sub>             | 1 | 60.415 | < 0.001 |
| Copper                       | 3 | 14.894 | < 0.001 |
| pCO <sub>2</sub> × Copper    | 3 | 7.666  | 0.002   |
| <b>Soluble carbohydrates</b> |   |        |         |
| pCO <sub>2</sub>             | 1 | 6.749  | 0.019   |
| Copper                       | 3 | 23.195 | < 0.001 |
| pCO <sub>2</sub> × Copper    | 3 | 19.967 | < 0.001 |

---
